# Supplementary material for: Programming the kinetics and extent of colloidal disassembly using a DNA trigger
Source: Royal Society of Chemistry journal article supplement (doi:10.1039/c0sm00222d), 2010-01-01
Supplement: c0sm00222d.pdf [file c0sm00222d.pdf]

## Electronic Supplementary Information

**Title: Programming the Kinetics and Extent of Colloidal Disassembly Using a DNA Trigger**

**Authors: Christopher Kirby Tison and Valeria Tohver Milam**

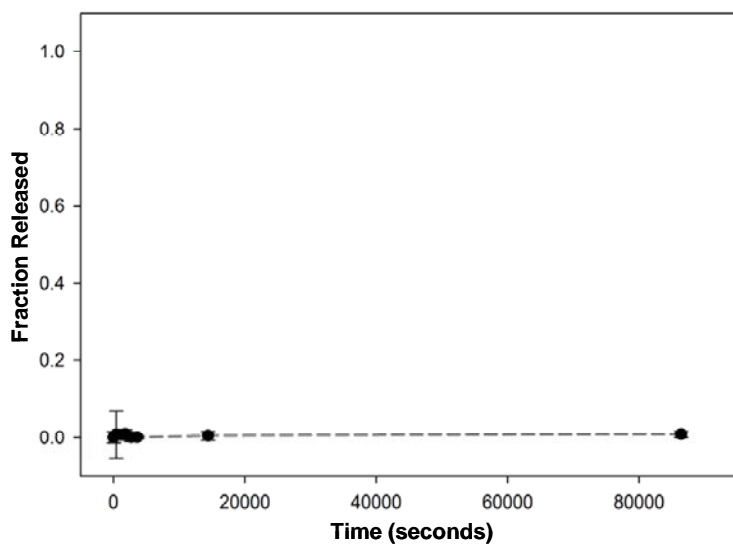

**Figure S1:** Fraction of primary targets (**B10**) released from immobilized duplexes as a function of incubation time with noncomplementary, secondary targets (**NC20**) in PBS/Tween buffer. The fraction of FITC-labeled primary targets released or dissociated was measured by comparing the surface density of labeled primary duplexes remaining at  $t = x$  to the original surface duplex density at  $t = 0$ . This control experiment demonstrates that little, if any thermal dissociation occurs for the 10 base-long primary duplexes over the 24 h experimental timeframe.
